# Supplementary material
Source: PubMed Central journal article supplement (PMC2596349)
Supplement: NIHMS2728-supplement-suppl_2.pdf [file NIHMS2728-supplement-suppl_2.pdf]

Supplementary Figure 2.

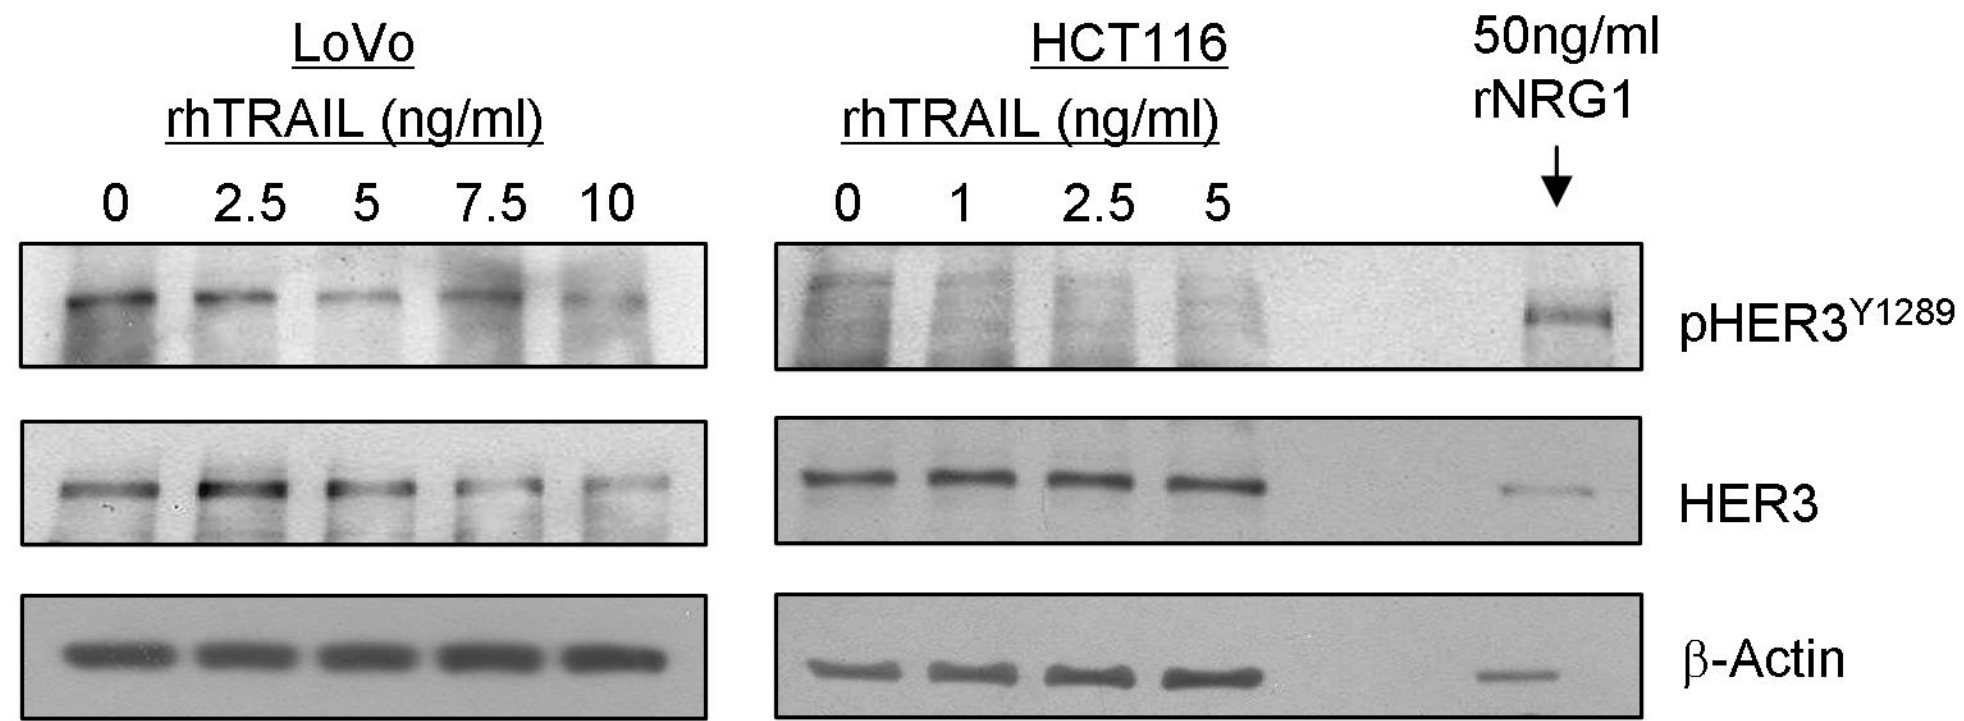

**SFig. 2 Effect of rhTRAIL on HER3 expression and activation.** HCT116-p53wt and LoVo cells were treated with increasing doses of rhTRAIL for 24 hours. pHER3<sup>Y1289</sup> and tHER3 levels were determined by Western blotting. Equal loading was assessed by probing for β-actin. As basal levels of pHER3<sup>Y1289</sup> were low, a positive control of cells stimulated with 50ng/ml recombinant neuregulin (rNRG1) for 10 minutes was used.
