# Supplementary material
Source: PubMed Central journal article supplement (PMC2596349)
Supplement: NIHMS2728-supplement-suppl_4.pdf [file NIHMS2728-supplement-suppl_4.pdf]

Supplementary Figure 4.

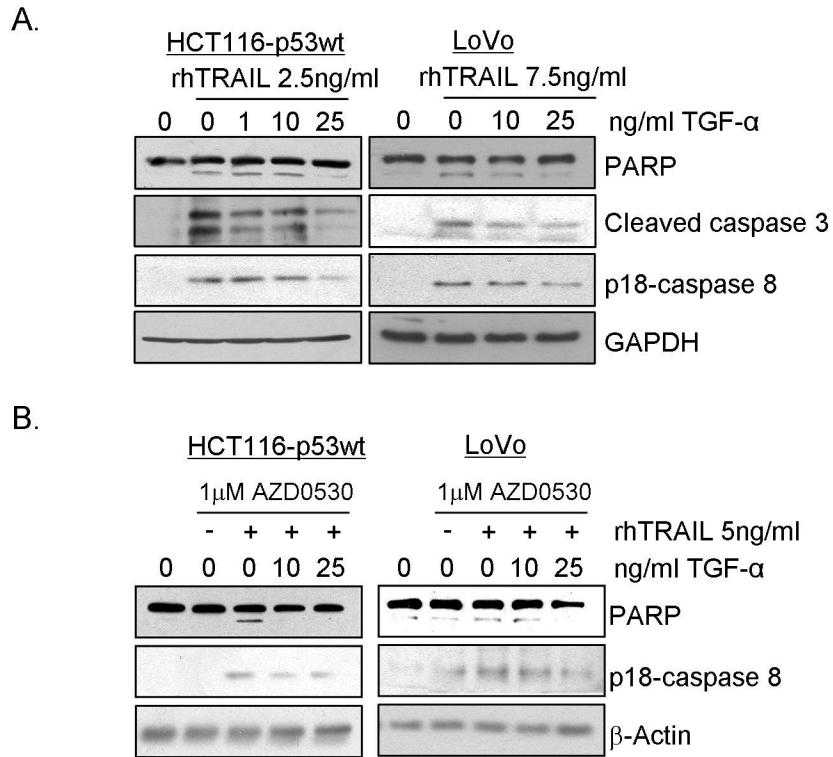

**SFig. 4 Effect of exogenous TGF- $\alpha$  on apoptosis induced by rhTRAIL.**

**A.** HCT116-p53wt and LoVo cells were treated with 2.5ng/ml or 7.5ng/ml rhTRAIL respectively in the absence or presence of 1ng/ml, 10ng/ml or 25ng/ml rhTGF- $\alpha$  for 6 hours and PARP, caspase 3 and caspase 8 cleavage were measured by Western Blotting. **B.** HCT116-p53wt and LoVo cells were exposed to AZD0530 for 24 hours followed by combination of rhTRAIL and 10ng/ml or 25ng/ml rhTGF- $\alpha$  for 6 hours and PARP and caspase 8 cleavage were measured by Western Blotting. Equal loading was assessed by probing for  $\beta$ -actin or GAPDH.
